# Supplementary material
Source: PubMed Central journal article supplement (PMC2253621)
Supplement: pbio.0060028.sg001.pdf [file pbio.0060028.sg001.pdf]

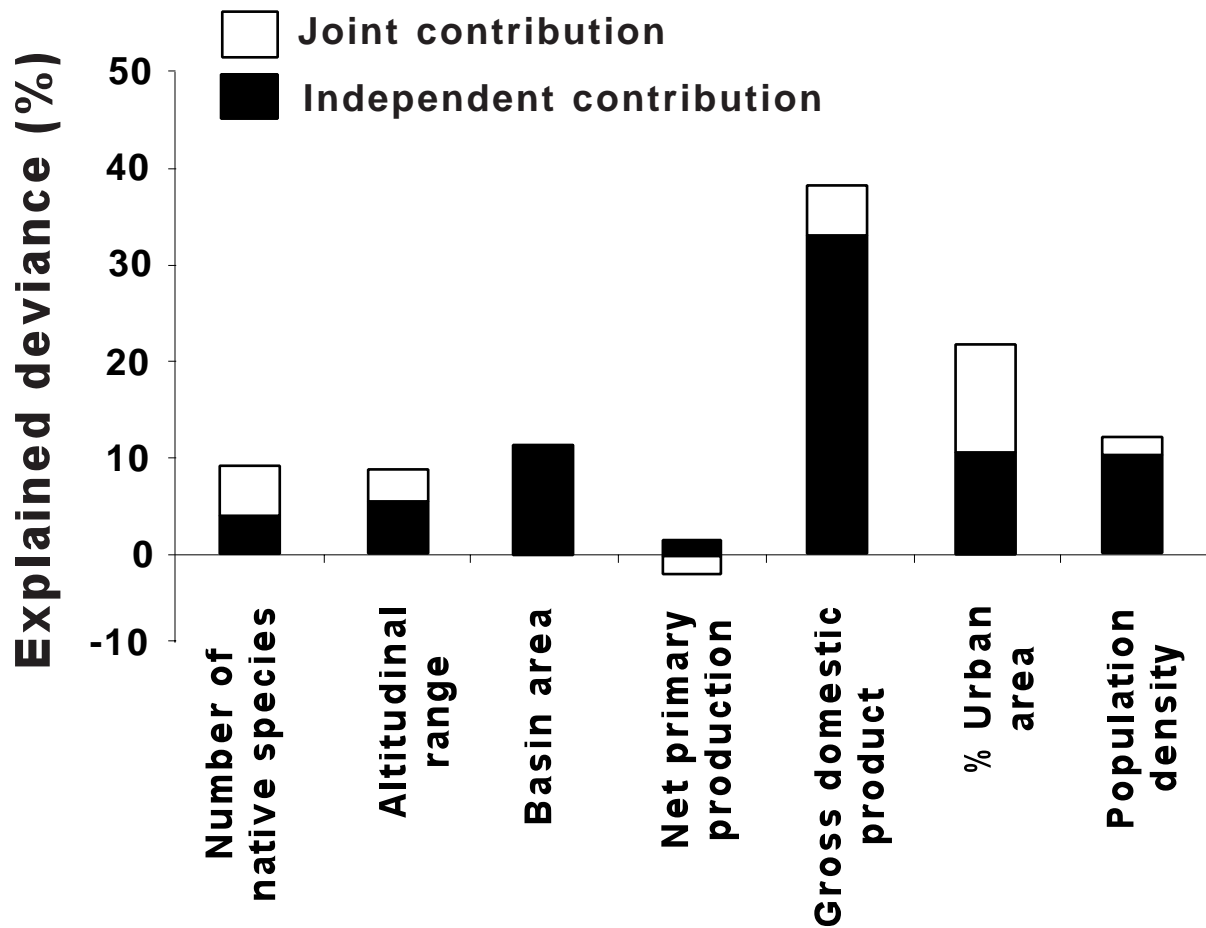

**Figure S1: Results from hierarchical partitioning analysis illustrating the independent and joint contributions of the explanatory variables in accounting for the variation in non-native species richness between river basins (n=597). Values are presented as the percentage of the total explained deviance extracted from a generalized linear model with a Poisson error. The total independent contribution of the explanatory variables accounts for 75% of the total explained deviance.**
