# Supplementary material
Source: PubMed Central journal article supplement (PMC2253621)
Supplement: pbio.0060028.st001.pdf [file pbio.0060028.st001.pdf]

**Table S1: Pearson correlation coefficient (r) between each explanatory variable** (NSR: number of natives species; AR: altitudinal range; BA: basin area; NPP: net primary productivity; GDP: gross domestic product; PUA: percentage of urban area, PD: population density). Bold values indicate a significant correlation,  $p < 0.002$  (bonferroni correction,  $\alpha = 0.002$ ).

|     | NSR         | AR          | BA           | NPP         | GDP         | PUA         | PD   |
|-----|-------------|-------------|--------------|-------------|-------------|-------------|------|
| NSR | 1.00        |             |              |             |             |             |      |
| AR  | <b>0.17</b> | 1.00        |              |             |             |             |      |
| BA  | <b>0.47</b> | <b>0.31</b> | 1.00         |             |             |             |      |
| NPP | <b>0.33</b> | 0.01        | <b>-0.25</b> | 1.00        |             |             |      |
| GDP | <b>0.16</b> | 0.10        | <b>-0.15</b> | <b>0.30</b> | 1.00        |             |      |
| PUA | <b>0.14</b> | -0.10       | <b>-0.16</b> | <b>0.18</b> | <b>0.64</b> | 1.00        |      |
| PD  | <b>0.15</b> | 0.08        | <b>-0.19</b> | <b>0.34</b> | <b>0.79</b> | <b>0.60</b> | 1.00 |
